# Supplementary material for: Co-assembled nanotubes with controlled curvature radius using a hydrogen bond regulation strategy
Source: Royal Society of Chemistry journal article supplement (doi:10.1039/d1ra05251a), 2021-01-01
Supplement: d1ra05251a1.pdf [file d1ra05251a1.pdf]

## 1. Materials

Unless otherwise noted, all starting materials, reagents, and solvents were obtained from commercial suppliers and were used without further purification. Analytical thin layer chromatography (TLC) was performed on glass silica gel plates; visualization of products was performed with a handheld UV lamp. All aqueous solutions were prepared with deionized distilled water obtained from a Milli-Q water-purifying system (18 MΩ cm).

## 2. Instruments and Measurements

The  $^1\text{H}$  and  $^{13}\text{C}$  NMR spectra were recorded on a AVANCE III 400MHz spectrometer using the residual solvent proton signal for calibration. Electrospray mass spectra were obtained on a Bruker maXis 4G ESI-Q-TOF. For cryo-TEM, samples were prepared at room temperature by placing a droplet on a TEM grid, and then the grid was blotted to remove excess solution with a filter paper. Afterward, the grid was immediately plunged into precooled liquid ethane at its freezing point ( $-172^\circ\text{C}$ ). The TEM instrument used was a JEOL JEM-2010 equipped with a Gatan 832 CCD camera. Electronic absorption spectra were recorded on a JASCO model V-570 UV/VIS/NIR spectrophotometer. FTIR spectra were recorded at room temperature on a JASCO model FT/IR-660Plus Fourier transform infrared spectrometer.

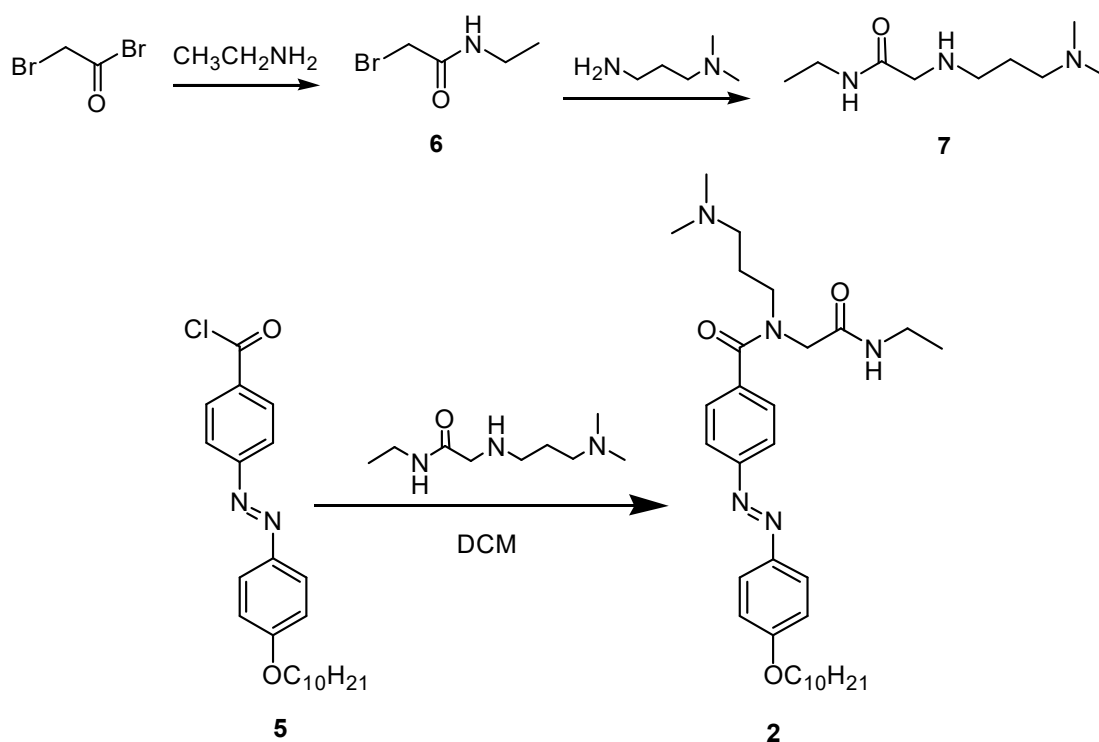

Figure S1. The scheme for the synthesis of compound 2.

**3. Synthesis** The compound **1** and **3** was synthesized according to the literature procedures.<sup>S1</sup> The synthesis of compound **2** was shown in Figure S1.

**Compound 2.** The compound **5** was synthesized according to the literature procedures.<sup>S2</sup> To a stirred solution of bromoacetyl bromide (220 mg, 1 mmol, 1.1 eq.) in 10 mL THF was added ethanamine (2mol/L in THF, 1.0 eq.) dropwise at -78°C. The mixture was allowed to warm to room temperature over 12 hours. After the reaction, the mixture was washed with saturated NaHCO<sub>3</sub> and extracted with EA. The resulting product (compound **6**) was taken directly to the next step without further purification.

A 50mL round bottom flask was charged with 3-(N,N-diethylamino)propylamine (1.1g, 11 mmol, 1.1eq.), H<sub>2</sub>O (20 mL), NaHCO<sub>3</sub> (10eq.), then the mixture was cooled to 0°C. Compound **6** (1.66 g, 10 mmol, 1.0eq.) in 10 mL H<sub>2</sub>O was added dropwise. The resulting mixture was allowed to warm to room temperature and stirred for another 12 hours. After the reaction, the product was extracted with CH<sub>2</sub>Cl<sub>2</sub>, dried over MgSO<sub>4</sub>, concentrated under vacuum to give the desired product (compound **7**) as colorless oil which was taken directly to the next step without purification.

Triethylamine (TEA, 0.075 mL, 1.1 eq.) was added dropwise to a stirred solution of compound **7** (206mg, 1.1 mmol, 1.1 eq.) in 20 mL CH<sub>2</sub>Cl<sub>2</sub>, then the mixture was cooled to 0°C. Compound **5** (400 mg, 1.0 mmol, 1.0 eq.) was dissolved in 10 mL CH<sub>2</sub>Cl<sub>2</sub> and added to the mixture at 0°C. Then the mixture was warmed to room temperature and stirred for 2 hours. After the reaction, the mixture was washed with water, followed by saturated NaHCO<sub>3</sub> and brine. The organic phase was dried over MgSO<sub>4</sub> and concentrated in vacuo by rotary evaporation. Purification via column chromatography (CH<sub>2</sub>Cl<sub>2</sub>: TEA=25:1). Yield: 35%. <sup>1</sup>H NMR (400 MHz, CDCl<sub>3</sub>) δ: 7.92 (d, *J* = 8.4 Hz, 4H), 7.57 (s, 2H), 7.01 (d, *J* = 8.8 Hz, 2H), 4.20-3.97 (m, 4H), 3.74-3.31 (m, 4H), 2.51 (s, 2H), 2.12 (s, 6H), 1.84-1.08 (m, 21H), 0.88 (t, *J* = 6.8 Hz, 3H). <sup>13</sup>C NMR (151 MHz, CDCl<sub>3</sub>) δ: 172.33, 169.09, 162.21, 153.42, 146.76, 136.84, 127.67, 125.07, 122.69, 114.79, 68.44, 56.30, 50.90, 49.50, 45.10, 34.44, 31.90, 31.44, 30.20, 29.70, 29.38, 29.32, 29.18, 26.47, 26.01, 22.69, 14.84, 14.12. MS (*m/z*): [M+H]<sup>+</sup> calcd for [C<sub>32</sub>H<sub>49</sub>N<sub>5</sub>O<sub>3</sub>], 551.38; found: 552.57

#### 4. Absorption

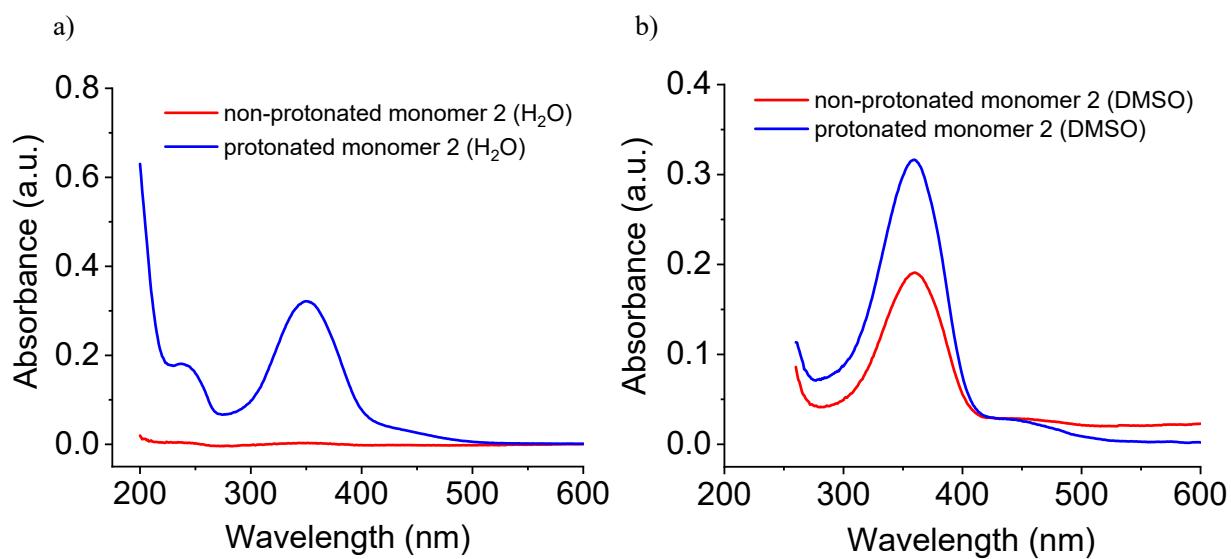

**Figure S2.** Absorption spectra of the non-protonated monomer (compound **2**, red) and the protonated monomer (cation **2**, blue) in water (a) and in DMSO (b).

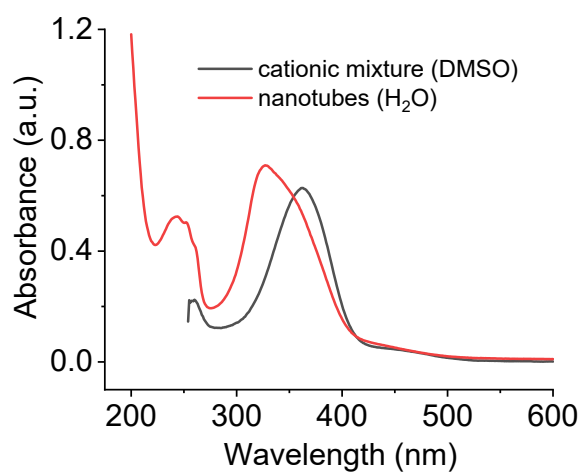

**Figure S3.** Absorption spectra of cations **1+2** in DMSO (black) and CO<sub>2</sub>-triggered co-assembled nanotubes of cations **1+2** system prepared in water (red).

## 5. Computational Details

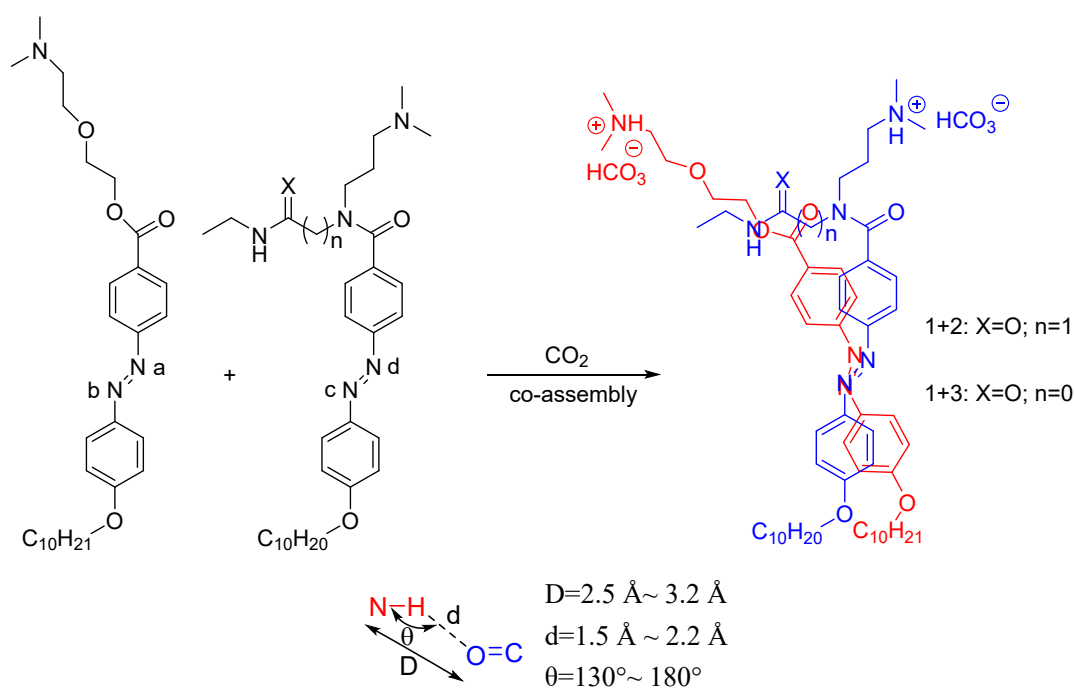

All the building blocks geometries were first optimized without geometry constraints using the B3LYP functional with the standard 6-31++G (d, p) basis set. The long hydrophobic chains of the building blocks are ignored to improve calculation efficiency. Based on the optimized building blocks geometries, dimers geometries of different systems were constructed separately according to the following methods. The  $\pi$ - $\pi$  stacking distance between two azobenzene molecules is about 0.34 nm, and the dihedral angle ( $\angle\text{Na-Nb-Nc-Nd}$ ) were scanned based on the structural parameters of the  $\text{N-H}\cdots\text{O}=\text{C}$  hydrogen bond. For the O and S systems, the dihedral angle ( $\angle\text{Na-Nb-Nc-Nd}$ ) was scanned from  $-27^\circ$  to  $-19^\circ$ , once every  $2^\circ$  for a total of 5 scans. For the CO system, the dihedral angle ( $\angle\text{Na-Nb-Nc-Nd}$ ) were scanned from  $5^\circ$  to  $13^\circ$ , once every  $2^\circ$  for a total of 5 scans. The dimers geometries were computed at the M06-2X/6-31G (d) level in aqueous solution (Polarizable continuum model, PCM) and in the gas phase. In addition, the calculation of the interaction energy in the gas phase takes into basis set superimposition error (BSSE). In all cases, analysis of vibrational frequencies ensures the found dimers geometries correspond to a local energy minimum. All calculations were done using Gaussian 09 program package<sup>S3</sup>.

The standard orientation of **1+2** ( $5^\circ$ ) as follows, other angles ( $7^\circ$ ,  $9^\circ$ ,  $11^\circ$  and  $13^\circ$ ) can be obtained by adjusting the dihedral angle( $\angle$ N8-N7-N69-N70):

| Center<br>Number | Atomic<br>Number | Atomic<br>Type | Coordinates (Angstroms) |           |           |
|------------------|------------------|----------------|-------------------------|-----------|-----------|
|                  |                  |                | X                       | Y         | Z         |
| 1                | 6                | 0              | -0.287572               | -1.959808 | -0.581875 |
| 2                | 6                | 0              | 1.104138                | -2.009468 | -0.616542 |
| 3                | 6                | 0              | 1.832433                | -1.066152 | -1.352693 |
| 4                | 6                | 0              | 1.148578                | -0.077982 | -2.084837 |
| 5                | 6                | 0              | -0.237074               | -0.043894 | -2.066296 |
| 6                | 6                | 0              | -0.969325               | -0.965635 | -1.297370 |
| 7                | 7                | 0              | 3.241839                | -1.208422 | -1.304443 |
| 8                | 7                | 0              | 3.880220                | -0.327383 | -1.946933 |
| 9                | 6                | 0              | 5.283307                | -0.462035 | -1.918449 |
| 10               | 6                | 0              | 6.006415                | 0.516396  | -2.621958 |
| 11               | 6                | 0              | 7.390173                | 0.479192  | -2.667984 |
| 12               | 6                | 0              | 8.085177                | -0.546929 | -2.007096 |
| 13               | 6                | 0              | 7.371575                | -1.529841 | -1.296860 |
| 14               | 6                | 0              | 5.983820                | -1.483335 | -1.256547 |
| 15               | 8                | 0              | 9.438722                | -0.504932 | -2.113298 |
| 16               | 6                | 0              | 10.221337               | -1.530740 | -1.496487 |
| 17               | 6                | 0              | -2.470725               | -0.927914 | -1.393326 |
| 18               | 8                | 0              | -3.007512               | -0.583146 | -2.444415 |
| 19               | 7                | 0              | -3.217546               | -1.312775 | -0.301549 |
| 20               | 6                | 0              | -4.666585               | -1.445900 | -0.485682 |
| 21               | 6                | 0              | -5.102785               | -2.850913 | -0.924824 |
| 22               | 6                | 0              | -6.615106               | -2.915289 | -1.162460 |
| 23               | 7                | 0              | -7.114268               | -4.265270 | -1.425278 |
| 24               | 6                | 0              | -8.567054               | -4.316763 | -1.327059 |
| 25               | 6                | 0              | -6.665349               | -4.796705 | -2.704876 |
| 26               | 1                | 0              | -0.849189               | -2.704648 | -0.026570 |
| 27               | 1                | 0              | 1.652663                | -2.778050 | -0.081439 |
| 28               | 1                | 0              | 1.723725                | 0.635809  | -2.662693 |
| 29               | 1                | 0              | -0.778812               | 0.690514  | -2.653575 |
| 30               | 1                | 0              | 5.450983                | 1.298808  | -3.129032 |
| 31               | 1                | 0              | 7.961049                | 1.225941  | -3.209139 |
| 32               | 1                | 0              | 7.892988                | -2.326548 | -0.779925 |
| 33               | 1                | 0              | 5.419616                | -2.234583 | -0.715830 |
| 34               | 1                | 0              | 10.060622               | -1.514584 | -0.438749 |
| 35               | 1                | 0              | 9.931374                | -2.483886 | -1.886787 |
| 36               | 1                | 0              | -5.136417               | -1.197554 | 0.467838  |
| 37               | 1                | 0              | -4.974448               | -0.689122 | -1.215057 |
| 38               | 1                | 0              | -4.560422               | -3.134245 | -1.835805 |

|    |   |   |           |           |           |
|----|---|---|-----------|-----------|-----------|
| 39 | 1 | 0 | -4.829410 | -3.566298 | -0.143922 |
| 40 | 1 | 0 | -7.119778 | -2.553477 | -0.258307 |
| 41 | 1 | 0 | -6.895035 | -2.213313 | -1.977098 |
| 42 | 1 | 0 | -8.884641 | -3.981156 | -0.334974 |
| 43 | 1 | 0 | -8.909565 | -5.347967 | -1.460555 |
| 44 | 1 | 0 | -9.082061 | -3.689043 | -2.081195 |
| 45 | 1 | 0 | -5.574600 | -4.858481 | -2.735882 |
| 46 | 1 | 0 | -7.055619 | -5.810825 | -2.835491 |
| 47 | 1 | 0 | -6.999627 | -4.190420 | -3.571135 |
| 48 | 6 | 0 | -2.719646 | -1.380602 | 1.055189  |
| 49 | 1 | 0 | -1.718675 | -0.944395 | 1.102964  |
| 50 | 1 | 0 | -3.358140 | -0.767180 | 1.704532  |
| 51 | 6 | 0 | -2.659235 | -2.821819 | 1.599334  |
| 52 | 8 | 0 | -2.809911 | -3.793974 | 0.869885  |
| 53 | 7 | 0 | -2.396166 | -2.963292 | 2.932905  |
| 54 | 1 | 0 | -2.296184 | -2.075422 | 3.409010  |
| 55 | 6 | 0 | -2.120635 | -4.177833 | 3.693400  |
| 56 | 1 | 0 | -2.596570 | -4.072591 | 4.674829  |
| 57 | 1 | 0 | -2.618786 | -5.020337 | 3.207600  |
| 58 | 6 | 0 | -0.626164 | -4.467726 | 3.867685  |
| 59 | 1 | 0 | -0.136770 | -4.616025 | 2.900085  |
| 60 | 1 | 0 | -0.124229 | -3.636634 | 4.373007  |
| 61 | 1 | 0 | -0.477762 | -5.370256 | 4.469540  |
| 62 | 1 | 0 | 11.257561 | -1.361252 | -1.702431 |
| 63 | 6 | 0 | -0.006728 | -0.006367 | 2.520161  |
| 64 | 6 | 0 | 1.378847  | 0.038002  | 2.438877  |
| 65 | 6 | 0 | 2.002992  | 1.033567  | 1.684846  |
| 66 | 6 | 0 | 1.237782  | 1.992298  | 1.008894  |
| 67 | 6 | 0 | -0.144683 | 1.946525  | 1.091283  |
| 68 | 6 | 0 | -0.770844 | 0.947010  | 1.846287  |
| 69 | 7 | 0 | 3.427148  | 0.984926  | 1.669592  |
| 70 | 7 | 0 | 3.959979  | 1.875122  | 0.974736  |
| 71 | 6 | 0 | 5.374036  | 1.848664  | 0.944596  |
| 72 | 6 | 0 | 5.982002  | 2.830760  | 0.153475  |
| 73 | 6 | 0 | 7.359397  | 2.895590  | 0.050591  |
| 74 | 6 | 0 | 8.153799  | 1.972756  | 0.744751  |
| 75 | 6 | 0 | 7.552374  | 0.986400  | 1.541498  |
| 76 | 6 | 0 | 6.169488  | 0.929751  | 1.636398  |
| 77 | 8 | 0 | 9.488075  | 2.109057  | 0.588199  |
| 78 | 6 | 0 | 10.335322 | 1.201918  | 1.276713  |
| 79 | 6 | 0 | -2.254153 | 0.861762  | 1.957116  |
| 80 | 8 | 0 | -2.875973 | 1.822488  | 1.261798  |
| 81 | 8 | 0 | -2.844863 | 0.021859  | 2.599622  |
| 82 | 6 | 0 | -4.305312 | 1.806205  | 1.313128  |

|     |   |   |            |           |           |
|-----|---|---|------------|-----------|-----------|
| 83  | 6 | 0 | -4.773086  | 2.964201  | 0.455644  |
| 84  | 8 | 0 | -6.178942  | 2.952444  | 0.487080  |
| 85  | 6 | 0 | -6.741128  | 4.015004  | -0.256259 |
| 86  | 6 | 0 | -8.252658  | 3.860266  | -0.189462 |
| 87  | 7 | 0 | -8.959274  | 5.020174  | -0.713907 |
| 88  | 6 | 0 | -10.382939 | 4.897693  | -0.436059 |
| 89  | 6 | 0 | -8.747467  | 5.173340  | -2.147047 |
| 90  | 1 | 0 | -0.508470  | -0.773166 | 3.100834  |
| 91  | 1 | 0 | 1.997318   | -0.691801 | 2.951350  |
| 92  | 1 | 0 | 1.738376   | 2.758619  | 0.428924  |
| 93  | 1 | 0 | -0.746409  | 2.684516  | 0.572791  |
| 94  | 1 | 0 | 5.349693   | 3.537306  | -0.375503 |
| 95  | 1 | 0 | 7.848282   | 3.648596  | -0.558134 |
| 96  | 1 | 0 | 8.152828   | 0.266390  | 2.084556  |
| 97  | 1 | 0 | 5.693252   | 0.172118  | 2.248839  |
| 98  | 1 | 0 | 10.197636  | 1.280629  | 2.360107  |
| 99  | 1 | 0 | 10.150616  | 0.171147  | 0.956894  |
| 100 | 1 | 0 | -4.679531  | 0.854098  | 0.926940  |
| 101 | 1 | 0 | -4.640932  | 1.921041  | 2.347340  |
| 102 | 1 | 0 | -4.377105  | 3.910667  | 0.853059  |
| 103 | 1 | 0 | -4.399955  | 2.845873  | -0.572559 |
| 104 | 1 | 0 | -6.447681  | 4.985729  | 0.171777  |
| 105 | 1 | 0 | -6.371955  | 3.974650  | -1.291472 |
| 106 | 1 | 0 | -8.546745  | 2.928895  | -0.711025 |
| 107 | 1 | 0 | -8.523296  | 3.742106  | 0.865669  |
| 108 | 1 | 0 | -10.905295 | 5.788472  | -0.796909 |
| 109 | 1 | 0 | -10.832788 | 4.013079  | -0.922973 |
| 110 | 1 | 0 | -10.544083 | 4.814572  | 0.642700  |
| 111 | 1 | 0 | -9.334307  | 6.021327  | -2.511068 |
| 112 | 1 | 0 | -9.051724  | 4.273299  | -2.713139 |
| 113 | 1 | 0 | -7.695651  | 5.377477  | -2.363025 |
| 114 | 1 | 0 | 11.353410  | 1.487751  | 1.016455  |

-----

The standard orientation of **1+3** (-19°) as follows, other angles(-21°, -23°, -25° and -27°) can be obtained by adjusting the dihedral angle( $\angle$ N8-N7-N66-N67):

| Center<br>Number | Atomic<br>Number | Atomic<br>Type | Coordinates (Angstroms) |          |           |
|------------------|------------------|----------------|-------------------------|----------|-----------|
|                  |                  |                | X                       | Y        | Z         |
| 1                | 6                | 0              | 0.193027                | 2.666627 | -0.473793 |
| 2                | 6                | 0              | -1.150268               | 2.374194 | -0.665440 |
| 3                | 6                | 0              | -1.529768               | 1.162391 | -1.246069 |
| 4                | 6                | 0              | -0.558390               | 0.245866 | -1.662800 |

|    |   |   |           |           |           |
|----|---|---|-----------|-----------|-----------|
| 5  | 6 | 0 | 0.782987  | 0.549575  | -1.488463 |
| 6  | 6 | 0 | 1.165402  | 1.746809  | -0.874397 |
| 7  | 7 | 0 | -2.933233 | 0.964328  | -1.381654 |
| 8  | 7 | 0 | -3.246582 | -0.140255 | -1.870523 |
| 9  | 6 | 0 | -4.639139 | -0.349905 | -2.018087 |
| 10 | 6 | 0 | -5.017218 | -1.581927 | -2.562770 |
| 11 | 6 | 0 | -6.352512 | -1.885347 | -2.752384 |
| 12 | 6 | 0 | -7.334691 | -0.952718 | -2.397148 |
| 13 | 6 | 0 | -6.964373 | 0.283377  | -1.849636 |
| 14 | 6 | 0 | -5.621201 | 0.577704  | -1.663354 |
| 15 | 8 | 0 | -8.613102 | -1.334607 | -2.620874 |
| 16 | 6 | 0 | -9.643402 | -0.425422 | -2.294164 |
| 17 | 6 | 0 | 2.633963  | 2.048237  | -0.784527 |
| 18 | 8 | 0 | 3.383297  | 1.713650  | -1.682806 |
| 19 | 7 | 0 | 3.100358  | 2.787229  | 0.296378  |
| 20 | 6 | 0 | 4.362716  | 3.515328  | 0.108510  |
| 21 | 6 | 0 | 4.161910  | 4.794179  | -0.698490 |
| 22 | 6 | 0 | 5.494021  | 5.494569  | -0.945844 |
| 23 | 7 | 0 | 5.347040  | 6.835336  | -1.494539 |
| 24 | 6 | 0 | 6.638121  | 7.495931  | -1.553892 |
| 25 | 6 | 0 | 4.733540  | 6.816828  | -2.810943 |
| 26 | 7 | 0 | 2.393670  | 1.994845  | 2.390096  |
| 27 | 6 | 0 | 1.536112  | 2.053092  | 3.565642  |
| 28 | 6 | 0 | 2.171263  | 2.839129  | 4.706751  |
| 29 | 1 | 0 | 0.486209  | 3.612266  | -0.024106 |
| 30 | 1 | 0 | -1.928672 | 3.072163  | -0.374680 |
| 31 | 1 | 0 | -0.874384 | -0.682289 | -2.124581 |
| 32 | 1 | 0 | 1.558598  | -0.127843 | -1.832327 |
| 33 | 1 | 0 | -4.237538 | -2.287460 | -2.832166 |
| 34 | 1 | 0 | -6.669725 | -2.832203 | -3.175232 |
| 35 | 1 | 0 | -7.713221 | 1.014835  | -1.569806 |
| 36 | 1 | 0 | -5.315722 | 1.528793  | -1.241757 |
| 37 | 1 | 0 | -9.644357 | -0.194012 | -1.222430 |
| 38 | 1 | 0 | -9.548150 | 0.504610  | -2.866980 |
| 39 | 1 | 0 | 4.753771  | 3.747130  | 1.100910  |
| 40 | 1 | 0 | 5.053246  | 2.837676  | -0.399049 |
| 41 | 1 | 0 | 3.683431  | 4.527915  | -1.648123 |
| 42 | 1 | 0 | 3.492926  | 5.464955  | -0.149111 |
| 43 | 1 | 0 | 6.024900  | 5.591182  | 0.010512  |
| 44 | 1 | 0 | 6.127886  | 4.861134  | -1.601314 |
| 45 | 1 | 0 | 7.076094  | 7.540622  | -0.552144 |
| 46 | 1 | 0 | 6.511414  | 8.519786  | -1.918261 |
| 47 | 1 | 0 | 7.353187  | 6.977847  | -2.221530 |
| 48 | 1 | 0 | 3.713874  | 6.429085  | -2.753343 |



|    |   |   |            |           |           |
|----|---|---|------------|-----------|-----------|
| 49 | 1 | 0 | 4.681267   | 7.838340  | -3.198825 |
| 50 | 1 | 0 | 5.301522   | 6.200646  | -3.534540 |
| 51 | 1 | 0 | 2.835574   | 1.123630  | 2.139937  |
| 52 | 1 | 0 | 0.590053   | 2.518953  | 3.270848  |
| 53 | 1 | 0 | 1.323476   | 1.022955  | 3.864395  |
| 54 | 1 | 0 | 1.501104   | 2.869716  | 5.570898  |
| 55 | 1 | 0 | 3.115627   | 2.381312  | 5.014539  |
| 56 | 1 | 0 | 2.365892   | 3.862538  | 4.378382  |
| 57 | 6 | 0 | 2.415601   | 3.029773  | 1.515301  |
| 58 | 8 | 0 | 1.933433   | 4.121218  | 1.760478  |
| 59 | 1 | 0 | -10.576711 | -0.921317 | -2.559416 |
| 60 | 6 | 0 | 0.536258   | 0.098992  | 2.018145  |
| 61 | 6 | 0 | -0.846840  | 0.215186  | 2.048396  |
| 62 | 6 | 0 | -1.645843  | -0.817329 | 1.555784  |
| 63 | 6 | 0 | -1.060147  | -1.976075 | 1.032383  |
| 64 | 6 | 0 | 0.320078   | -2.090727 | 1.003525  |
| 65 | 6 | 0 | 1.121618   | -1.053685 | 1.494642  |
| 66 | 7 | 0 | -3.050750  | -0.593024 | 1.631857  |
| 67 | 7 | 0 | -3.738867  | -1.521905 | 1.162726  |
| 68 | 6 | 0 | -5.138617  | -1.318320 | 1.229353  |
| 69 | 6 | 0 | -5.927192  | -2.340354 | 0.690599  |
| 70 | 6 | 0 | -7.306178  | -2.243490 | 0.701602  |
| 71 | 6 | 0 | -7.918752  | -1.114326 | 1.258232  |
| 72 | 6 | 0 | -7.136054  | -0.086395 | 1.801609  |
| 73 | 6 | 0 | -5.752466  | -0.193209 | 1.784120  |
| 74 | 8 | 0 | -9.271800  | -1.103911 | 1.227128  |
| 75 | 6 | 0 | -9.936367  | 0.010605  | 1.783900  |
| 76 | 6 | 0 | 2.609673   | -1.131005 | 1.476841  |
| 77 | 8 | 0 | 3.056441   | -2.282753 | 0.944468  |
| 78 | 8 | 0 | 3.345198   | -0.265814 | 1.887154  |
| 79 | 6 | 0 | 4.476984   | -2.419653 | 0.884631  |
| 80 | 6 | 0 | 4.744931   | -3.769279 | 0.251390  |
| 81 | 8 | 0 | 6.137909   | -3.912779 | 0.163966  |
| 82 | 6 | 0 | 6.521466   | -5.156219 | -0.378427 |
| 83 | 6 | 0 | 8.039519   | -5.160284 | -0.465427 |
| 84 | 7 | 0 | 8.576290   | -6.471097 | -0.794582 |
| 85 | 6 | 0 | 10.019527  | -6.478414 | -0.629060 |
| 86 | 6 | 0 | 8.227238   | -6.875559 | -2.146295 |
| 87 | 1 | 0 | 1.179975   | 0.887869  | 2.393129  |
| 88 | 1 | 0 | -1.334356  | 1.099059  | 2.446908  |
| 89 | 1 | 0 | -1.701233  | -2.765037 | 0.656936  |
| 90 | 1 | 0 | 0.788761   | -2.982204 | 0.601959  |
| 91 | 1 | 0 | -5.428601  | -3.206171 | 0.265996  |
| 92 | 1 | 0 | -7.938022  | -3.022439 | 0.289123  |

|     |   |   |            |           |           |
|-----|---|---|------------|-----------|-----------|
| 93  | 1 | 0 | -7.596316  | 0.793294  | 2.235930  |
| 94  | 1 | 0 | -5.130191  | 0.591806  | 2.199423  |
| 95  | 1 | 0 | -9.706934  | 0.118257  | 2.850574  |
| 96  | 1 | 0 | -9.669437  | 0.935788  | 1.259693  |
| 97  | 1 | 0 | 4.906659   | -1.611360 | 0.286291  |
| 98  | 1 | 0 | 4.902257   | -2.364146 | 1.890437  |
| 99  | 1 | 0 | 4.301023   | -4.567570 | 0.866690  |
| 100 | 1 | 0 | 4.277670   | -3.815178 | -0.745014 |
| 101 | 1 | 0 | 6.188829   | -5.985554 | 0.264929  |
| 102 | 1 | 0 | 6.056021   | -5.286503 | -1.367887 |
| 103 | 1 | 0 | 8.365247   | -4.383391 | -1.184313 |
| 104 | 1 | 0 | 8.419034   | -4.869758 | 0.520083  |
| 105 | 1 | 0 | 10.406565  | -7.481498 | -0.831360 |
| 106 | 1 | 0 | 10.529559  | -5.767942 | -1.306477 |
| 107 | 1 | 0 | 10.274365  | -6.213456 | 0.401123  |
| 108 | 1 | 0 | 8.681200   | -7.847015 | -2.362009 |
| 109 | 1 | 0 | 8.577755   | -6.152625 | -2.907713 |
| 110 | 1 | 0 | 7.144581   | -6.986074 | -2.248958 |
| 111 | 1 | 0 | -11.001692 | -0.181865 | 1.659717  |

---

Table S1. Relative energies (in kJ·mol<sup>-1</sup>) of co-assemblies at different dihedral angles <sup>a</sup>

| dihedral angle (°) | $E_I^b$        | $E_x^c$        | $E_{assemblies}$ | $\Delta E^d$ |
|--------------------|----------------|----------------|------------------|--------------|
| <b>1+2</b>         | -3260573.605   | -3660060.883   |                  |              |
|                    | (-3260538.719) | (-3660001.566) |                  |              |
| 5                  | -              | -              | -6920695.929     | -61.440      |
|                    |                |                | (-6920575.754)   | (-35.469)    |
| 7                  | -              | -              | -6920659.319     | -24.831      |
|                    |                |                | (-6920578.523)   | (-38.238)    |
| 9                  | -              | -              | -6920650.609     | -16.120      |
|                    |                |                | (-6920617.804)   | (-77.518)    |
| 11                 | -              | -              | -6920695.929     | -61.440      |
|                    |                |                | (-6920617.840)   | (-77.555)    |
| 13                 | -              | -              | -6920707.274     | -72.785      |
|                    |                |                | (-6920617.804)   | (-77.518)    |
| <b>1+3</b>         | -3260573.605   | -3556942.231   |                  |              |
|                    | (-3260538.719) | (-3556893.931) |                  |              |
| -19                | -              | -              | -6817583.457     | -67.621      |
|                    |                |                | (-6817517.347)   | (-84.697)    |
| -21                | -              | -              | -6817583.434     | -67.597      |
|                    |                |                | (-6817517.523)   | (-84.873)    |
| -23                | -              | -              | -6817582.935     | -67.098      |
|                    |                |                | (-6817517.523)   | (-84.873)    |
| -25                | -              | -              | -6817583.431     | -67.594      |
|                    |                |                | (-6817517.515)   | (-84.865)    |
| -27                | -              | -              | -6817583.444     | -67.607      |
|                    |                |                | (-6817517.528)   | (-84.878)    |

<sup>a</sup> The energies outside the brackets were obtained in the water phase at M06-2X/6-31G (d) level of theory, and the energies inside brackets were obtained after basis set superposition error (BSSE) correction in the gas phase with the equivalent theoretical level.

<sup>b</sup>  $E_I$  represents the energies parameter of the monomer **1**.

<sup>c</sup>  $E_x$  represents the energies of **2**, and **3**, respectively.

<sup>d</sup>  $\Delta E$  represents interaction energies,  $\Delta E = E_{assemblies} - (E_I + E_x)$ .

## Notes and references

- S1 L. C. Palmer, C.-Y. Leung, S. Kewalramani, R. Kumthekar, C. J. Newcomb, M. O. de la Cruz, M. J. Bedzyk, S. I. Stupp, *J. Am. Chem. Soc.* **2014**, *136*, 14377–14380.
- S2 L. Zhang, L. Zhou, N. Xu, Z. Ouyang, *Angew. Chem. Int. Ed.* **2017**, *56*, 8191-8195.
- S3 M. J. Frisch, G. W. Trucks, H. B. Schlegel, G. E. Scuseria, M. A. Robb, J. R. Cheeseman, G. Scalmani, V. Barone, B. Mennucci, G. A. Petersson, H. Nakatsuji, M. Caricato, X. Li, H. P. Hratchian, A. F. Izmaylov, J. Bloino, G. Zheng, J. L. Sonnenberg, M. Hada, M. Ehara, K. Toyota, R. Fukuda, J. Hasegawa, M. Ishida, T. Nakajima, Y. Honda, O. Kitao, H. Nakai, T. Vreven, J. A. Montgomery Jr, J. E. Peralta, F. Ogliaro, M. Bearpark, J. J. Heyd, E. Brothers, K. N. Kudin, V. N. Staroverov, R. Kobayashi, J. Normand, K. Raghavachari, A. Rendell, J. C. Burant, S. S. Iyengar, J. Tomasi, M. Cossi, N. Rega, J. M. Millam, M. Klene, J. E. Knox, J. B. Cross, V. Bakken, C. Adamo, J. Jaramillo, R. Gomperts, R. E. Stratmann, O. Yazyev, A. J. Austin, R. Cammi, C. Pomelli, J. W. Ochterski, R. L. Martin, K. Morokuma, V. G. Zakrzewski, G. A. Voth, P. Salvador, J. J. Dannenberg, S. Dapprich, A. D. Daniels, O. Farkas, J. B. Foresman, J. V. Ortiz, J. Cioslowski, D. J. Fox, Gaussian 09, Revision D.01; Gaussian, Inc., Wallingford, CT, 2009.
